# Supplementary material
Source: PubMed Central journal article supplement (PMC4061359)

Appendix Table 1: Cox-Model

| Covariate                      | Survival         |         | Myocardial Infarction |         | Repeat PCI/CABG  |         |
|--------------------------------|------------------|---------|-----------------------|---------|------------------|---------|
|                                | HR (95% CI)      | p-value | HR (95% CI)           | p-value | HR (95% CI)      | p-value |
| <b>Treatment</b>               |                  |         |                       |         |                  |         |
| Medical therapy                | referent         |         | referent              |         | referent         |         |
| Revascularization              | 0.76 (0.68-0.84) | <0.001  | 0.78 (0.72-0.85)      | <0.001  | 0.59 (0.50-0.70) | <0.001  |
| <b>Demographics</b>            |                  |         |                       |         |                  |         |
| Age, yrs                       | 1.06 (1.05-1.06) | <0.001  | 1.008 (1.003-1.014)   | 0.001   | 0.99(0.99-0.995) | 0.001   |
| Male gender                    | 1.18 (1.07-1.30) | 0.001   | 0.94 (0.88-0.998)     | 0.043   | 1.05 (0.99-1.12) | 0.097   |
| Rural                          | 1.03 (0.90-1.18) | 0.678   | 0.96 (0.86-1.07)      | 0.436   | 0.99 (0.90-1.08) | 0.795   |
| Income                         |                  |         |                       |         |                  |         |
| 5                              | referent         |         | referent              |         | referent         |         |
| 1                              | 1.32 (1.18-1.48) | <0.001  | 1.24 (1.13-1.37)      | <0.001  | 1.01(0.94-1.09)  | 0.702   |
| 2                              | 1.15 (1.02-1.30) | 0.023   | 1.10 (1.03-1.17)      | 0.004   | 1.00 (0.92-1.07) | 0.916   |
| 3                              | 1.04 (0.92-1.16) | 0.561   | 1.05 (0.97-1.14)      | 0.234   | 1.03 (0.96-1.11) | 0.431   |
| 4                              | 1.15 (1.04-1.27) | 0.005   | 0.99 (0.88-1.10)      | 0.812   | 0.96 (0.88-1.04) | 0.277   |
| <b>Medical comorbidities</b>   |                  |         |                       |         |                  |         |
| PVD                            | 1.54 (1.40-1.70) | <0.001  | 1.32 (1.22-1.43)      | <0.001  | 1.02 (0.92-1.14) | 0.657   |
| Previous MI                    | 1.03 (0.95-1.12) | 0.429   | 1.88 (1.72-2.06)      | <0.001  | 0.98 (0.92-1.04) | 0.459   |
| COPD                           | 1.44 (1.29-1.61) | <0.001  | 1.09 (0.989-1.20)     | 0.085   | 0.99 (0.90-1.08) | 0.761   |
| Malignancy                     | 1.26 (1.09-1.46) | 0.002   | 0.78 (0.64-0.95)      | 0.015   | 0.99 (0.83-1.18) | 0.918   |
| Mean Charlson score            | 1.24 (1.20-1.29) | <0.001  | 1.22 (1.17-1.27)      | <0.001  | 1.03 (0.99-1.08) | 0.126   |
| <b>Cardiac risk factors</b>    |                  |         |                       |         |                  |         |
| Diabetes                       | 1.09 (1.00-1.19) | 0.053   | 0.95 (0.85-1.07)      | 0.395   | 1.08 (1.01-1.14) | 0.021   |
| Hypertension                   | 1.08 (0.94-1.24) | 0.289   | 1.29 (1.11-1.50)      | <0.001  | 1.05 (0.97-1.11) | 0.130   |
| Hyperlipidemia                 | 0.81 (0.72-0.91) | <0.001  | 0.93 (0.84-1.03)      | 0.153   | 0.99(0.94-1.05)  | 0.867   |
| History smoking                | 1.10 (1.01-1.21) | 0.033   | 1.01 (0.92-1.10)      | 0.909   | 1.03 (0.98-1.08) | 0.313   |
| <b>Cardiac status/testing</b>  |                  |         |                       |         |                  |         |
| Native stenosis*               |                  |         |                       |         |                  |         |
| LM                             | 1.27 (1.12-1.44) | <0.001  | 1.09 (0.99-1.21)      | 0.088   | 0.89 (0.79-1.01) | 0.063   |
| Prox LAD                       | 1.11 (1.03-1.19) | 0.009   | 1.05 (0.97-1.12)      | 0.220   | 1.16 (1.09-1.23) | <0.001  |
| Mid/distal LAD                 | 0.99 (0.93-1.06) | 0.745   | 1.11 (1.04-1.20)      | 0.004   | 1.20 (1.13-1.28) | <0.001  |
| Circumflex                     | 1.17 (1.09-1.27) | <0.001  | 1.16 (1.07-1.27)      | <0.001  | 1.24 (1.17-1.32) | <0.001  |
| RCA                            | 1.29 (1.21-1.39) | <0.001  | 1.15 (1.06-1.24)      | <0.001  | 1.33(1.27-1.39)  | <0.001  |
| Previous CABG                  | 0.85 (0.76-0.95) | 0.005   | 1.17 (1.08-1.27)      | <0.001  | 0.71 (0.64-0.78) | <0.001  |
| LV function                    |                  |         |                       |         |                  |         |
| ≥50%                           | referent         |         | referent              |         | referent         |         |
| ≤34%                           | 1.93 (1.62-2.30) | <0.001  | 1.45 (1.30-1.61)      | <0.001  | 0.83 (0.74-0.93) | 0.002   |
| 35%-49%                        | 1.36 (1.20-1.53) | <0.001  | 1.27 (1.17-1.38)      | <0.001  | 0.90 (0.82-0.99) | 0.038   |
| NA                             | 0.96 (0.86-1.07) | 0.482   | 1.15 (1.04-1.28)      | 0.008   | 0.91 (0.83-1.00) | 0.056   |
| Exercise ECG risk              |                  |         |                       |         |                  |         |
| Low risk                       | referent         |         | referent              |         | referent         |         |
| High risk                      | 1.01 (0.87-1.16) | 0.942   | 1.01 (0.84-1.23)      | 0.885   | 1.10(1.02-1.18)  | 0.012   |
| Uninterpretable                | 1.33 (1.11-1.58) | 0.002   | 0.94 (0.81-1.09)      | 0.384   | 0.90 (0.77-1.04) | 0.158   |
| NA                             | 1.71 (1.51-1.93) | <0.001  | 1.42 (1.28-1.57)      | <0.001  | 1.19(1.11-1.27)  | <0.001  |
| Functional imaging risk        |                  |         |                       |         |                  |         |
| Low risk                       | referent         |         | referent              |         | referent         |         |
| High risk                      | 1.11 (0.99-1.24) | 0.075   | 0.97 (0.87-1.07)      | 0.501   | 1.00 (0.92-1.09) | 0.998   |
| Unknown/NA                     | 1.14 (1.03-1.27) | 0.014   | 1.03 (0.95-1.12)      | 0.506   | 1.12 (1.04-1.21) | 0.002   |
| <b>CCS class</b>               |                  |         |                       |         |                  |         |
| 0                              | referent         |         | referent              |         | referent         |         |
| 1                              | 0.86 (0.77-0.97) | 0.011   | 0.97 (0.84-1.12)      | 0.704   | 1.13 (1.01-1.27) | 0.036   |
| 2                              | 0.82 (0.73-0.91) | <0.001  | 1.08 (0.94-1.23)      | 0.286   | 1.25(1.15-1.35)  | <0.001  |
| 3                              | 0.88 (0.79-0.99) | 0.027   | 1.16 (1.04-1.30)      | 0.006   | 1.46 (1.34-1.58) | <0.001  |
| 4                              | 0.96 (0.79-1.18) | 0.724   | 1.28 (1.06-1.53)      | 0.009   | 1.39 (1.16-1.65) | <0.001  |
| <b>Physician-level factors</b> |                  |         |                       |         |                  |         |
| Referral physician             |                  |         |                       |         |                  |         |
| Specialty                      |                  |         |                       |         |                  |         |
| GP/FP                          | referent         |         | referent              |         | referent         |         |
| Cardiology                     | 1.00 (0.91-1.10) | 1.000   | 1.10 (1.01-1.19)      | 0.022   | 1.03 (0.96-1.11) | 0.368   |
| Internal medicine              | 0.98 (0.82-1.16) | 0.784   | 1.07 (0.94-1.21)      | 0.323   | 1.02 (0.93-1.13) | 0.685   |
| Other                          | 1.16 (0.98-1.36) | 0.083   | 1.25 (1.11-1.42)      | <0.001  | 0.97 (0.85-1.10) | 0.612   |

|                                    |                  |       |                  |       |                  |       |
|------------------------------------|------------------|-------|------------------|-------|------------------|-------|
| Missing                            | 1.06 (0.96-1.16) | 0.278 | 1.10 (0.97-1.25) | 0.150 | 1.10 (1.03-1.18) | 0.007 |
| <b>Hospital-level factors</b>      |                  |       |                  |       |                  |       |
| Average annual volume per hospital |                  |       |                  |       |                  |       |
| Mean Cath volume                   | 1.00 (1.00-1.00) | 0.260 | 1.00 (1.00-1.00) | 0.002 | 1.04 (0.87-1.24) | 0.910 |
| Hospital type                      |                  |       |                  |       |                  |       |
| CABG, PCI and Cath                 | referent         |       | referent         |       | referent         |       |
| Cath only                          | 1.12 (0.97-1.29) | 0.126 | 0.97 (0.83-1.12) | 0.644 | 1.04 (0.87-1.24) | 0.665 |
| PCI and Cath only                  | 0.92 (0.79-1.08) | 0.313 | 1.14 (0.78-1.67) | 0.499 | 1.13 (0.95-1.34) | 0.167 |

HR=Hazard ratio, CI = confidence interval

CABG= coronary artery bypass grafting; COPD = chronic obstructive pulmonary disease;

MI = myocardial infarction; PCI = percutaneous coronary intervention;

GP/FP=practitioner/family practitioner

PVD = peripheral vascular disease, LM = left main, LAD = left anterior descending,

RCA = right coronary artery, LV = left ventricular, ECG = electrocardiogram,

CCS= Canadian Cardiovascular Society, Cath = catheterization, GP/FP = general

\*Income quintile: 1=lowest, 5 = highest;

† LM if  $\geq 50\%$  stenosis, Prox LAD if  $\geq 70\%$  stenosis, Mid/distal LAD if  $\geq 70\%$  stenosis,

Circumflex if  $\geq 70\%$  stenosis, RCA if  $\geq 70\%$  stenosis

NA implies not done or missing

**Appendix Table 2: Medication Use in Propensity Matched Cohort > 65 years**

| <b>Medication</b>                                 | <b>Total<br/>(n=13,535)</b> | <b>Medical therapy<br/>patients (n=6,753)</b> | <b>Revascularized patients<br/>(n=6,782)</b> | <b>p-value</b> |
|---------------------------------------------------|-----------------------------|-----------------------------------------------|----------------------------------------------|----------------|
| <b>Medications within 3 months pre-index, %</b>   |                             |                                               |                                              |                |
| ACE or ARB                                        | 69.0                        | 68.9                                          | 69.1                                         | 0.781          |
| Anti-platelet agents (clopidogrol)                | 17.4                        | 16.3                                          | 18.5                                         | <0.001         |
| β blockers                                        | 68.0                        | 66.8                                          | 69.1                                         | 0.004          |
| Calcium Channel blockers                          | 38.6                        | 38.3                                          | 38.9                                         | 0.471          |
| Nitrates                                          | 45.5                        | 41.5                                          | 49.6                                         | <0.001         |
| Statins                                           | 75.3                        | 75.4                                          | 75.1                                         | 0.607          |
| <b>Medications within 3 months post-index, %</b>  |                             |                                               |                                              |                |
| ACE or ARB                                        | 71.7                        | 71.6                                          | 71.8                                         | 0.757          |
| Anti-platelet agents (clopidogrol)                | 47.2                        | 19.7                                          | 74.5                                         | <0.001         |
| β blockers                                        | 68.0                        | 66.8                                          | 69.1                                         | <0.001         |
| Calcium Channel blockers                          | 39.9                        | 41.5                                          | 38.2                                         | <0.001         |
| Nitrates                                          | 32.5                        | 35.0                                          | 30.0                                         | <0.001         |
| Statins                                           | 83.6                        | 81.7                                          | 85.4                                         | <0.001         |
| <b>Medications within 12 months post-index, %</b> |                             |                                               |                                              |                |
| ACE or ARB                                        | 81.4                        | 80.9                                          | 81.9                                         | 0.826          |
| Anti-platelet agents (clopidogrol)                | 52.3                        | 27.1                                          | 77.3                                         | <0.001         |
| β blockers                                        | 76.6                        | 76.3                                          | 76.9                                         | 0.443          |
| Calcium Channel blockers                          | 47.1                        | 48.5                                          | 45.8                                         | <0.001         |
| Nitrates                                          | 45.0                        | 47.1                                          | 42.8                                         | <0.001         |
| Statins                                           | 92.7                        | 91.3                                          | 94.1                                         | <0.001         |

ACE= angiotension converting enzyme inhibitors; ARB= angiotension receptor blockers

**Appendix Table 3: Baseline Characteristics of Propensity Matched COURAGE Cohort**

| <b>Covariate</b>               | <b>Medical therapy patients (n=4,838)</b> | <b>Revascularized patients (n=4,838)</b> | <b>Total (n=9,676)</b> | <b>Excluded Patients (n=29,455)</b> | <b>p-value*</b> |
|--------------------------------|-------------------------------------------|------------------------------------------|------------------------|-------------------------------------|-----------------|
| <b>Treatment</b>               |                                           |                                          |                        |                                     |                 |
| CABG                           | 0.0                                       | 21.0                                     | 10.5                   | 25.0                                | <0.001          |
| PCI                            | 0.0                                       | 79.0                                     | 39.5                   | 40.0                                |                 |
| Medical therapy                | 100.0                                     | 0.0                                      | 50.0                   | 35.0                                |                 |
| <b>Demographics</b>            |                                           |                                          |                        |                                     |                 |
| Mean age, yrs                  | 65.77 ± 10.17                             | 65.87 ± 10.15                            | 65.82 ± 10.16          | 66.05 ± 10.35                       | 0.054           |
| Male gender                    | 72.6                                      | 72.5                                     | 72.5                   | 76.1                                | 0.0             |
| Rural                          | 12.1                                      | 12.4                                     | 12.2                   | 15.2                                |                 |
| Income                         |                                           |                                          |                        |                                     |                 |
| 1                              | 18.8                                      | 19.3                                     | 19.0                   | 18.4                                |                 |
| 2                              | 20.0                                      | 19.9                                     | 20.0                   | 20.6                                |                 |
| 3                              | 20.3                                      | 20.2                                     | 20.3                   | 20.2                                |                 |
| 4                              | 20.7                                      | 20.7                                     | 20.7                   | 20.7                                |                 |
| 5                              | 20.1                                      | 19.9                                     | 20.0                   | 20.1                                |                 |
| <b>Medical comorbidities</b>   |                                           |                                          |                        |                                     |                 |
| PVD                            | 8.4                                       | 8.3                                      | 8.4                    | 9.7                                 |                 |
| Previous MI                    | 29.1                                      | 28.1                                     | 28.6                   | 28.0                                |                 |
| COPD                           | 6.2                                       | 6.4                                      | 6.3                    | 7.1                                 |                 |
| Mean Charlson score            | 0.80 ± 1.22                               | 0.81 ± 1.28                              | 0.81 ± 1.25            | 0.88 ± 1.36                         |                 |
| <b>Cardiac risk factors</b>    |                                           |                                          |                        |                                     |                 |
| Diabetes                       | 45.0                                      | 45.5                                     | 45.2                   | 43.5                                | 0.0             |
| Hypertension                   | 87.9                                      | 88.7                                     | 88.3                   | 86.2                                | <0.001          |
| Hyperlipidemia                 | 82.9                                      | 83.3                                     | 83.1                   | 80.1                                | <0.001          |
| History smoking                | 31.3                                      | 31.3                                     | 31.3                   | 31.7                                | 0.5             |
| <b>Cardiac status/testing</b>  |                                           |                                          |                        |                                     |                 |
| Native stenosis**              |                                           |                                          |                        |                                     |                 |
| LM                             | 0.0                                       | 0.0                                      | 0.0                    | 17.3                                | <0.001          |
| Prox LAD                       | 26.8                                      | 25.8                                     | 26.3                   | 35.4                                | <0.001          |
| Mid/distal LAD                 | 49.6                                      | 49.1                                     | 49.3                   | 49.7                                | 0.515           |
| Circumflex                     | 48.2                                      | 48.7                                     | 48.5                   | 52.5                                | <0.001          |
| RCA                            | 58.1                                      | 58.4                                     | 58.2                   | 61.6                                | <0.001          |
| Had previous CABG              |                                           |                                          |                        |                                     |                 |
| Yes                            | 16.3                                      | 15.3                                     | 15.8                   | 18.7                                | <0.001          |
| No                             | 83.6                                      | 84.6                                     | 84.1                   | 81.2                                |                 |
| Unknown                        | 0.1                                       | 0.1                                      | 0.1                    | 0.1                                 |                 |
| LV function                    |                                           |                                          |                        |                                     |                 |
| NA                             | 0.0                                       | 0.0                                      | 0.0                    | 37.7                                | <0.001          |
| <=34%                          | 0.0                                       | 0.0                                      | 0.0                    | 6.7                                 |                 |
| 35%-49%                        | 16.4                                      | 15.4                                     | 15.9                   | 11.7                                |                 |
| ≥50%                           | 83.6                                      | 84.6                                     | 84.1                   | 43.9                                |                 |
| Exercise ECG risk              |                                           |                                          |                        |                                     |                 |
| High risk                      | 33.6                                      | 33.1                                     | 33.4                   | 25.8                                | <0.001          |
| Low risk                       | 37.2                                      | 38.2                                     | 37.7                   | 17.4                                |                 |
| Uninterpretable                | 5.9                                       | 6.1                                      | 6.0                    | 4.5                                 |                 |
| NA                             | 23.2                                      | 22.6                                     | 22.9                   | 52.3                                |                 |
| Functional imaging risk        |                                           |                                          |                        |                                     |                 |
| High risk                      | 41.7                                      | 41.9                                     | 41.8                   | 28.8                                | <0.001          |
| Low risk                       | 35.6                                      | 35.4                                     | 35.5                   | 19.0                                |                 |
| Unknown/NA                     | 22.7                                      | 22.7                                     | 22.7                   | 52.2                                |                 |
| <b>CCS class</b>               |                                           |                                          |                        |                                     |                 |
| 0                              | 14.7                                      | 15.6                                     | 15.2                   | 16.9                                | <0.001          |
| 1                              | 12.3                                      | 12.9                                     | 12.6                   | 14.5                                |                 |
| 2                              | 27.4                                      | 26.7                                     | 27.1                   | 41.9                                |                 |
| 3                              | 45.6                                      | 44.8                                     | 45.2                   | 23.0                                |                 |
| <b>Physician-level factors</b> |                                           |                                          |                        |                                     |                 |

*Referral physician*

Specialty

|                   |      |      |      |      |
|-------------------|------|------|------|------|
| Cardiology        | 43.4 | 47.0 | 45.2 | 45.2 |
| Internal medicine | 9.5  | 9.1  | 9.3  | 9.3  |
| GP/FP             | 27.1 | 24.7 | 25.9 | 25.9 |

**Hospital-level factors**

Average annual volume per hospital

|                  |                     |                     |                     |                     |       |
|------------------|---------------------|---------------------|---------------------|---------------------|-------|
| Mean Cath volume | 4,143.37 ± 1,679.79 | 4,139.48 ± 1,701.16 | 4,141.43 ± 1,690.42 | 4,076.20 ± 1,698.09 | 0.001 |
|------------------|---------------------|---------------------|---------------------|---------------------|-------|

Hospital type

|                    |      |      |      |      |        |
|--------------------|------|------|------|------|--------|
| Cath only          | 12.0 | 14.0 | 13.0 | 13.3 | <0.001 |
| PCI and Cath only  | 5.7  | 4.5  | 5.1  | 6.4  |        |
| CABG, PCI and Cath | 82.2 | 81.5 | 81.9 | 80.4 |        |

---

All covariates are presented as percentages, with the exception of mean values.

Mean values include standard deviation.

CABG= coronary artery bypass grafting; COPD = chronic obstructive pulmonary disease;

MI = myocardial infarction; PCI = percutaneous coronary intervention;

GP/FP=practitioner/family practitioner

PVD = peripheral vascular disease, LM = left main, LAD = left anterior descending,

RCA = right coronary artery, LV = left ventricular, ECG = electrocardiogram,

CCS= Canadian Cardiovascular Society, Cath = catheterization, GP/FP = general

\* p-value for comparison of COURAGE subgroup to excluded patients.

\*\*Income quintile: 1=lowest, 5 = highest;

† LM if ≥50% stenosis, Prox LAD if ≥70% stenosis, Mid/distal LAD if ≥70% stenosis,

Circumflex if ≥70% stenosis, RCA if ≥70% stenosis

NA implies not done or missing

Appendix Figure 1a: Unadjusted KM Curves for Survival

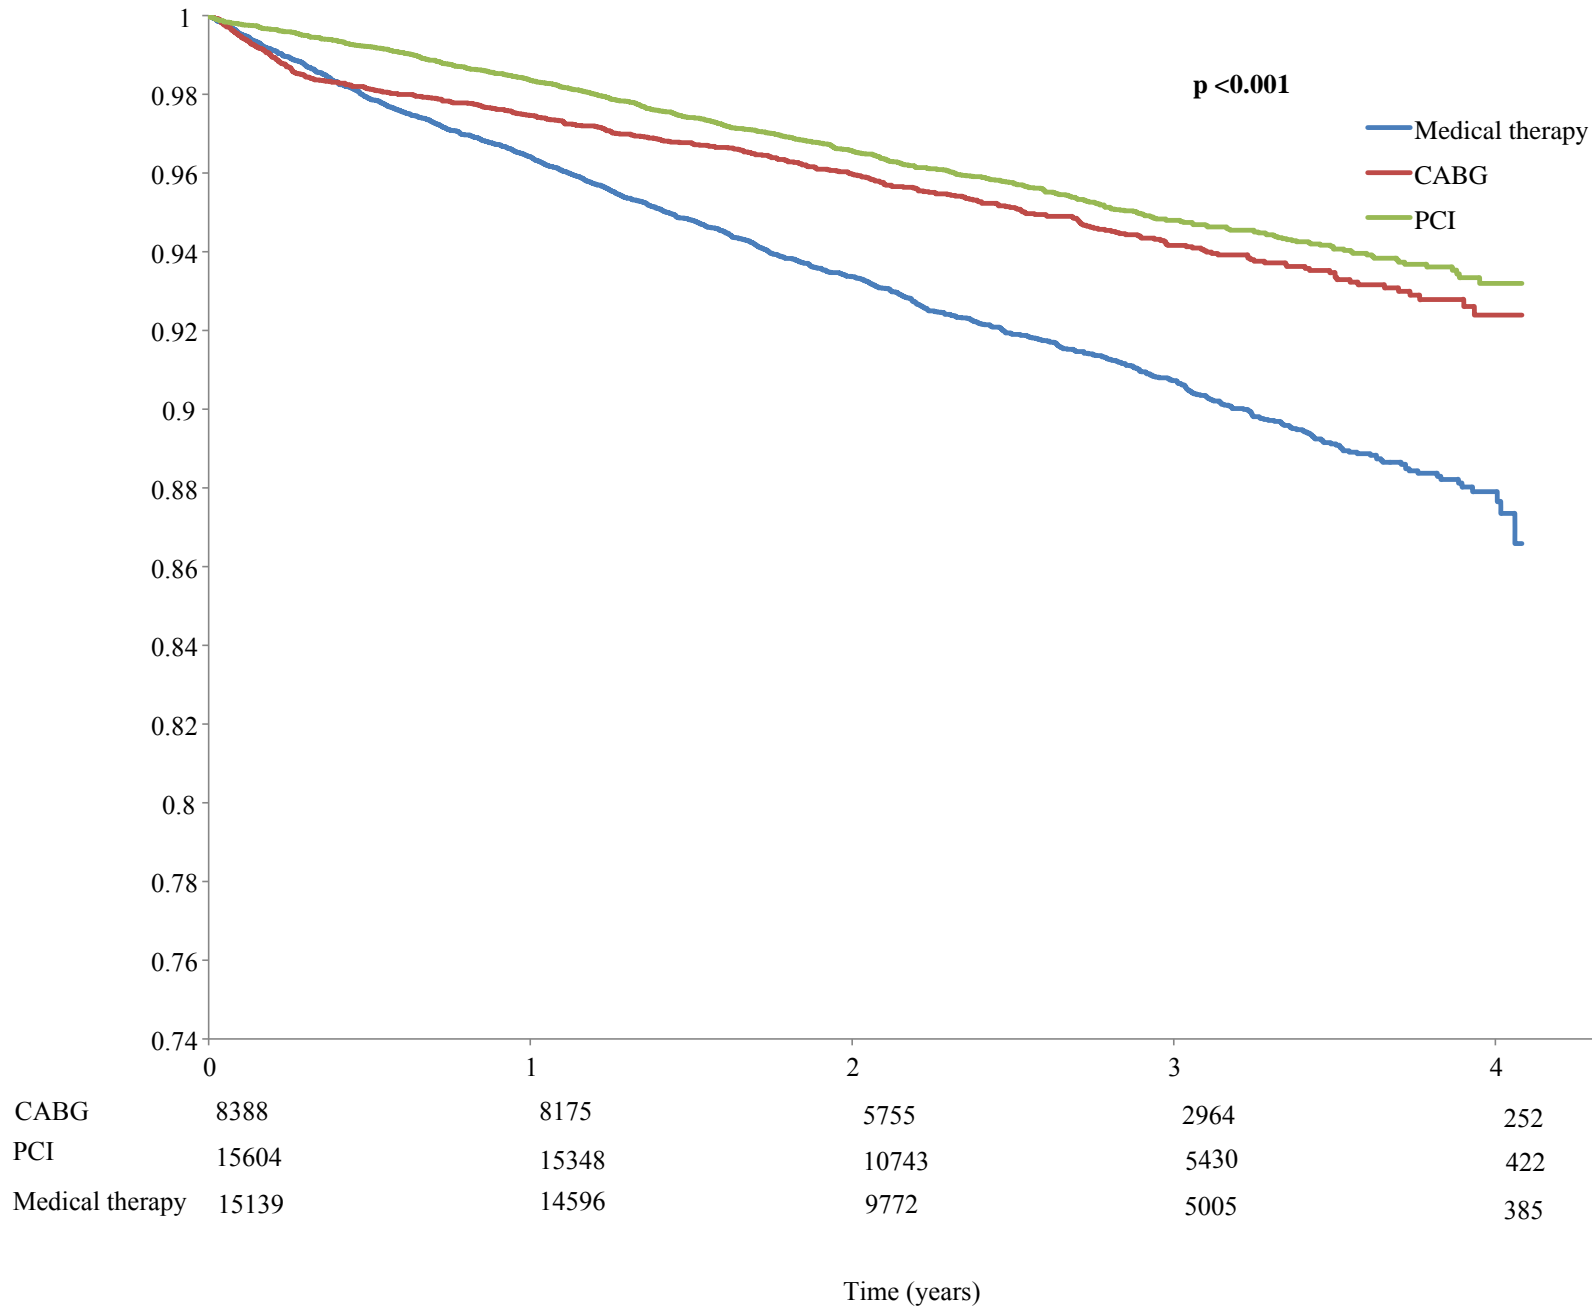

Appendix Figure 1b: Unadjusted KM Curves for Myocardial Infarction

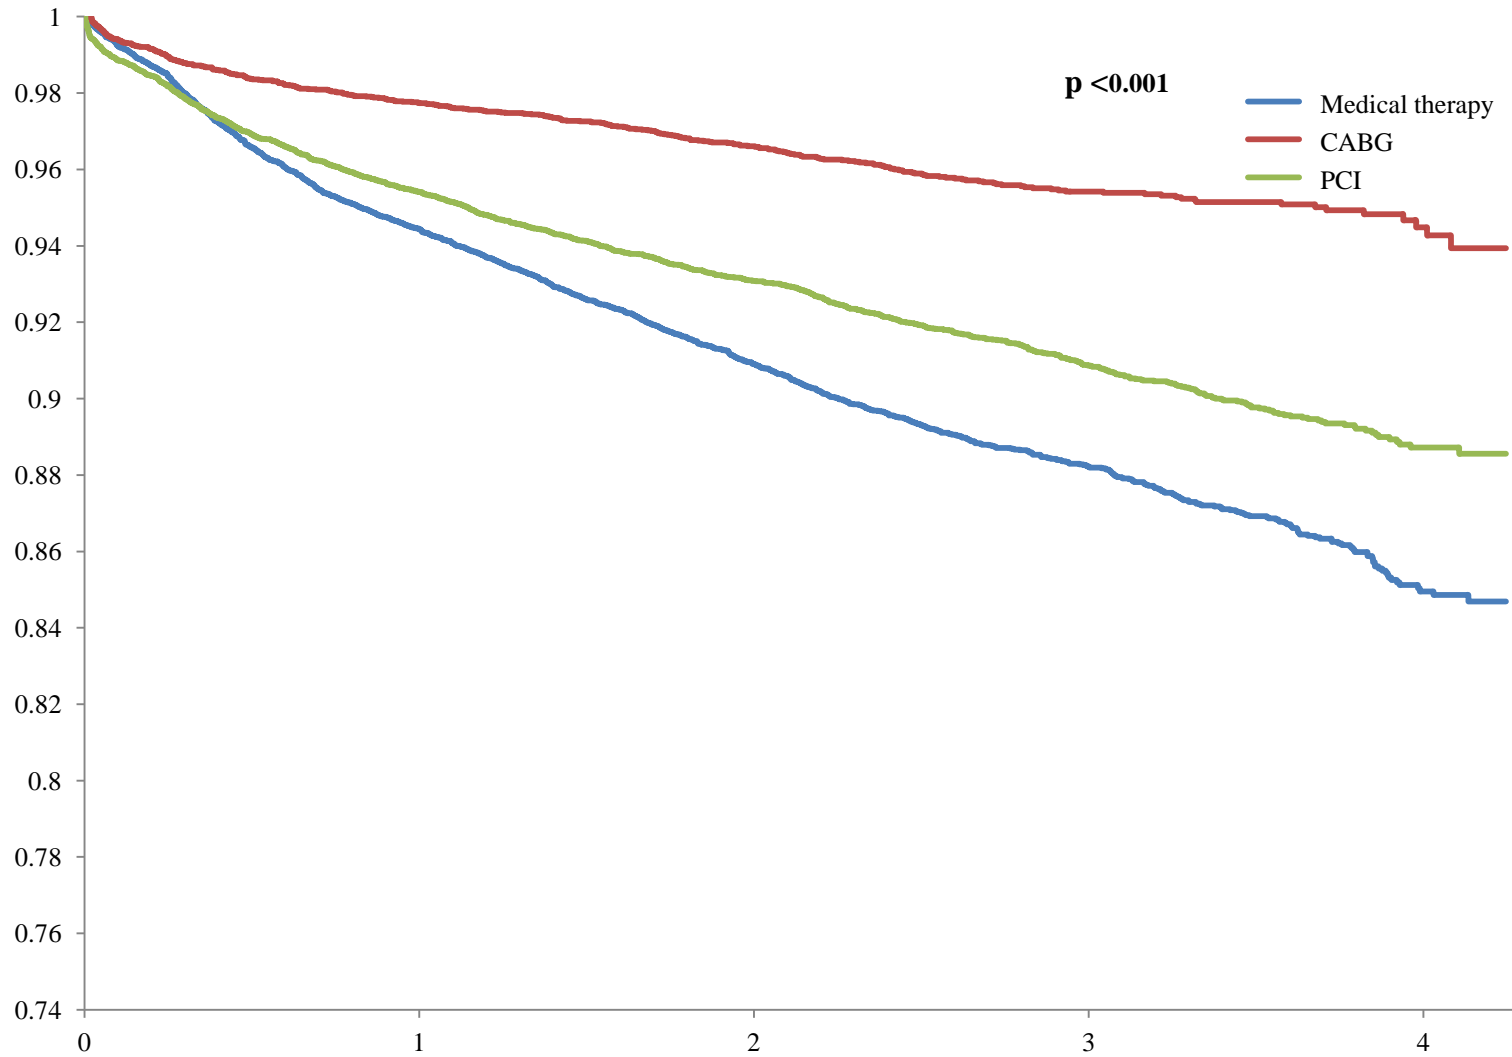

|                 |       |       |       |      |     |
|-----------------|-------|-------|-------|------|-----|
| CABG            | 8388  | 7993  | 5781  | 3044 | 466 |
| PCI             | 15604 | 14708 | 10782 | 5669 | 950 |
| Medical therapy | 15139 | 13913 | 9717  | 5195 | 972 |

Time (years)

Appendix Figure 1c: Unadjusted KM Curves for Repeat Revascularization

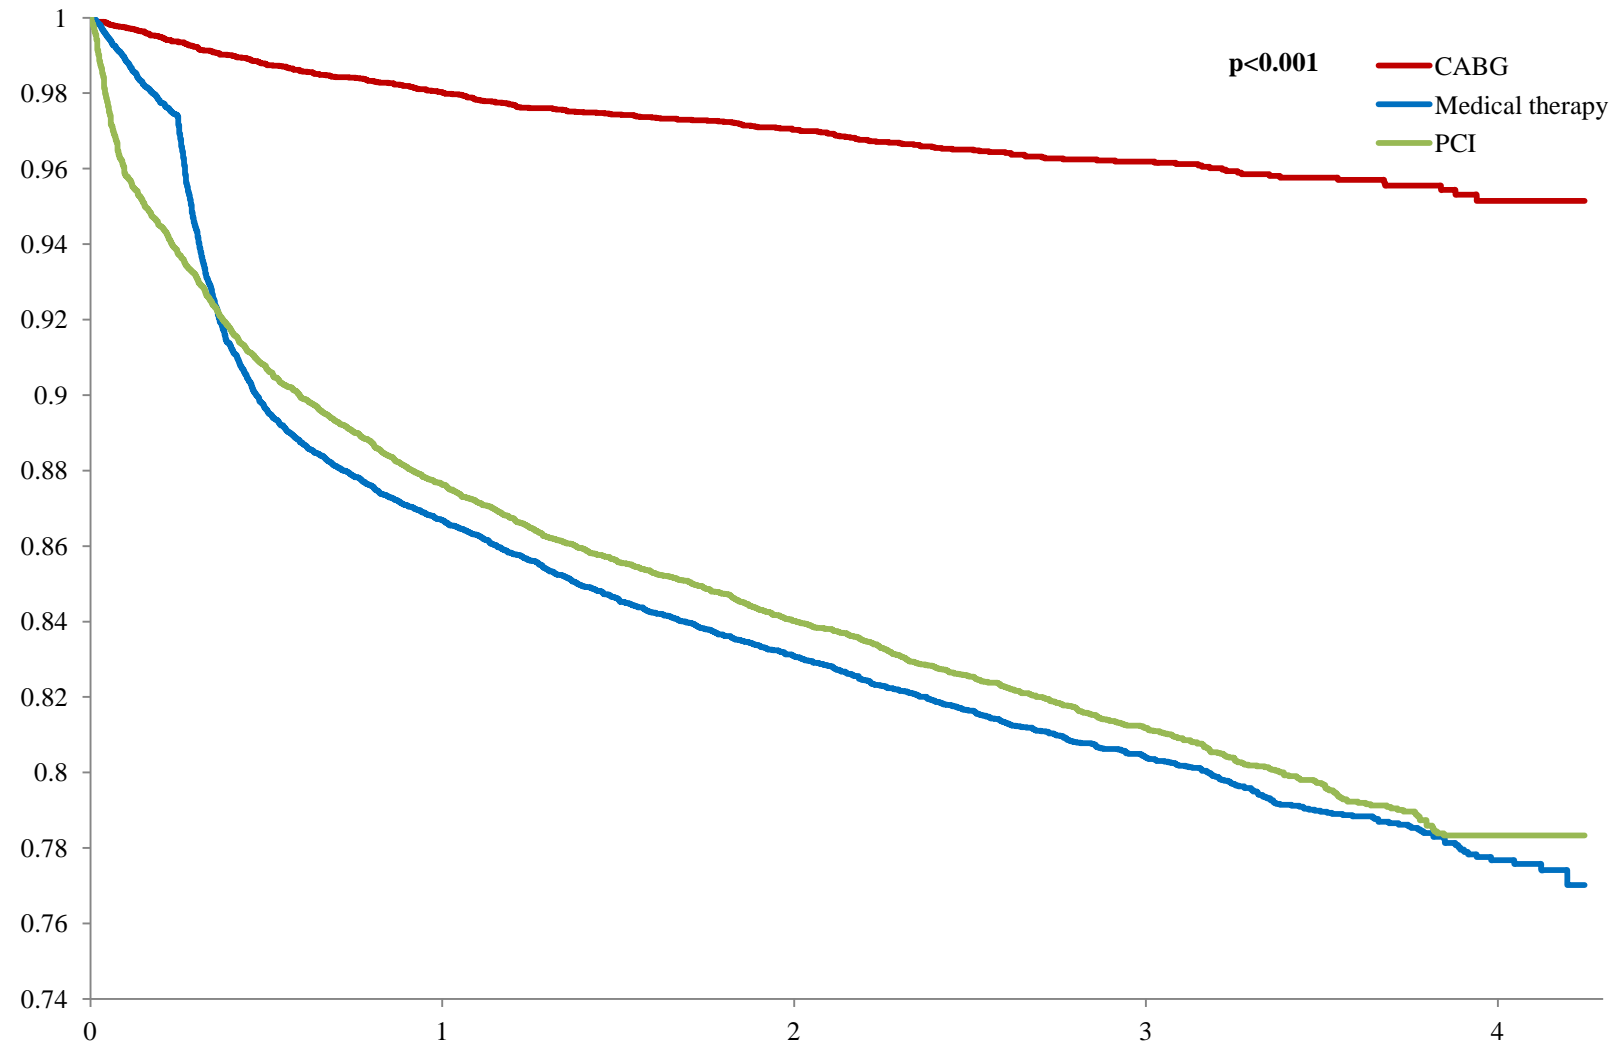

|                 |       |       |      |      |     |
|-----------------|-------|-------|------|------|-----|
| CABG            | 8388  | 8007  | 5776 | 3049 | 454 |
| PCI             | 15604 | 13460 | 9642 | 5004 | 806 |
| Medical therapy | 15319 | 12670 | 8971 | 4695 | 879 |

Time (years)



Appendix Figure 2: COURAGE Cohort

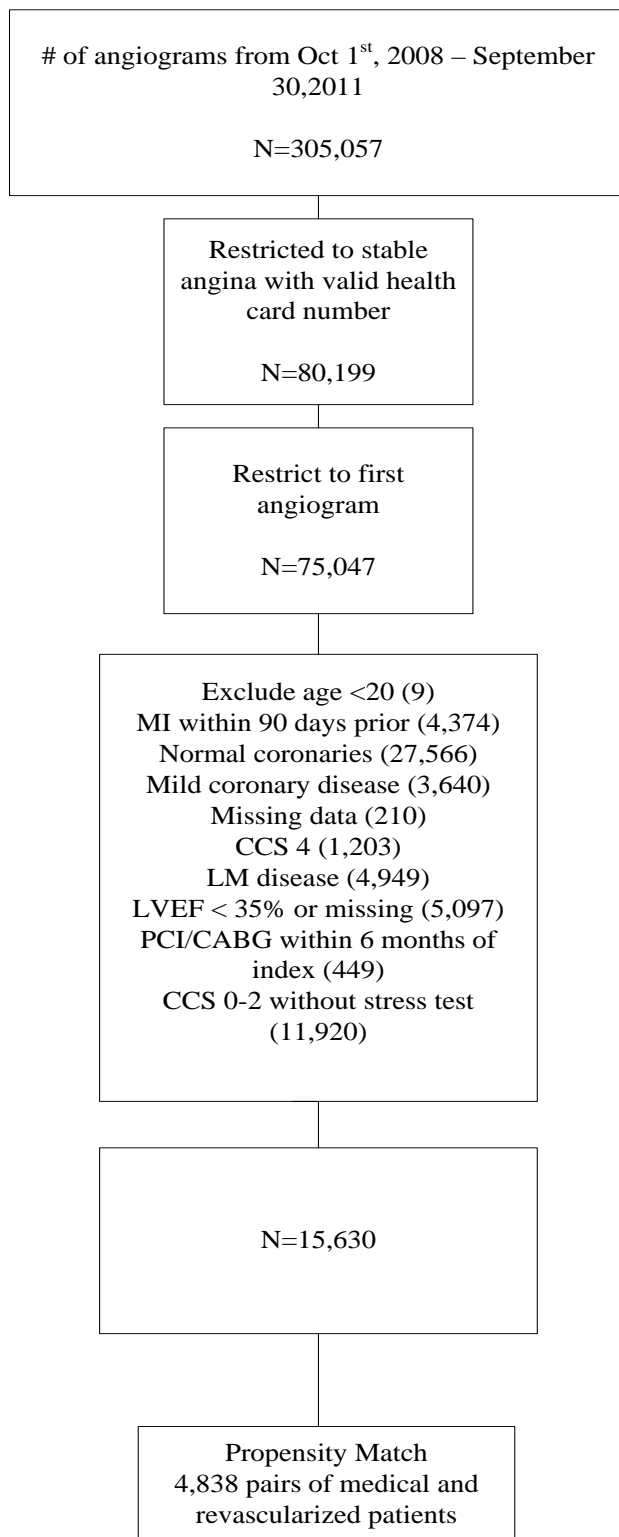

Appendix Figure 3a: COURAGE Propensity-Matched Cohort KM Curves for Death

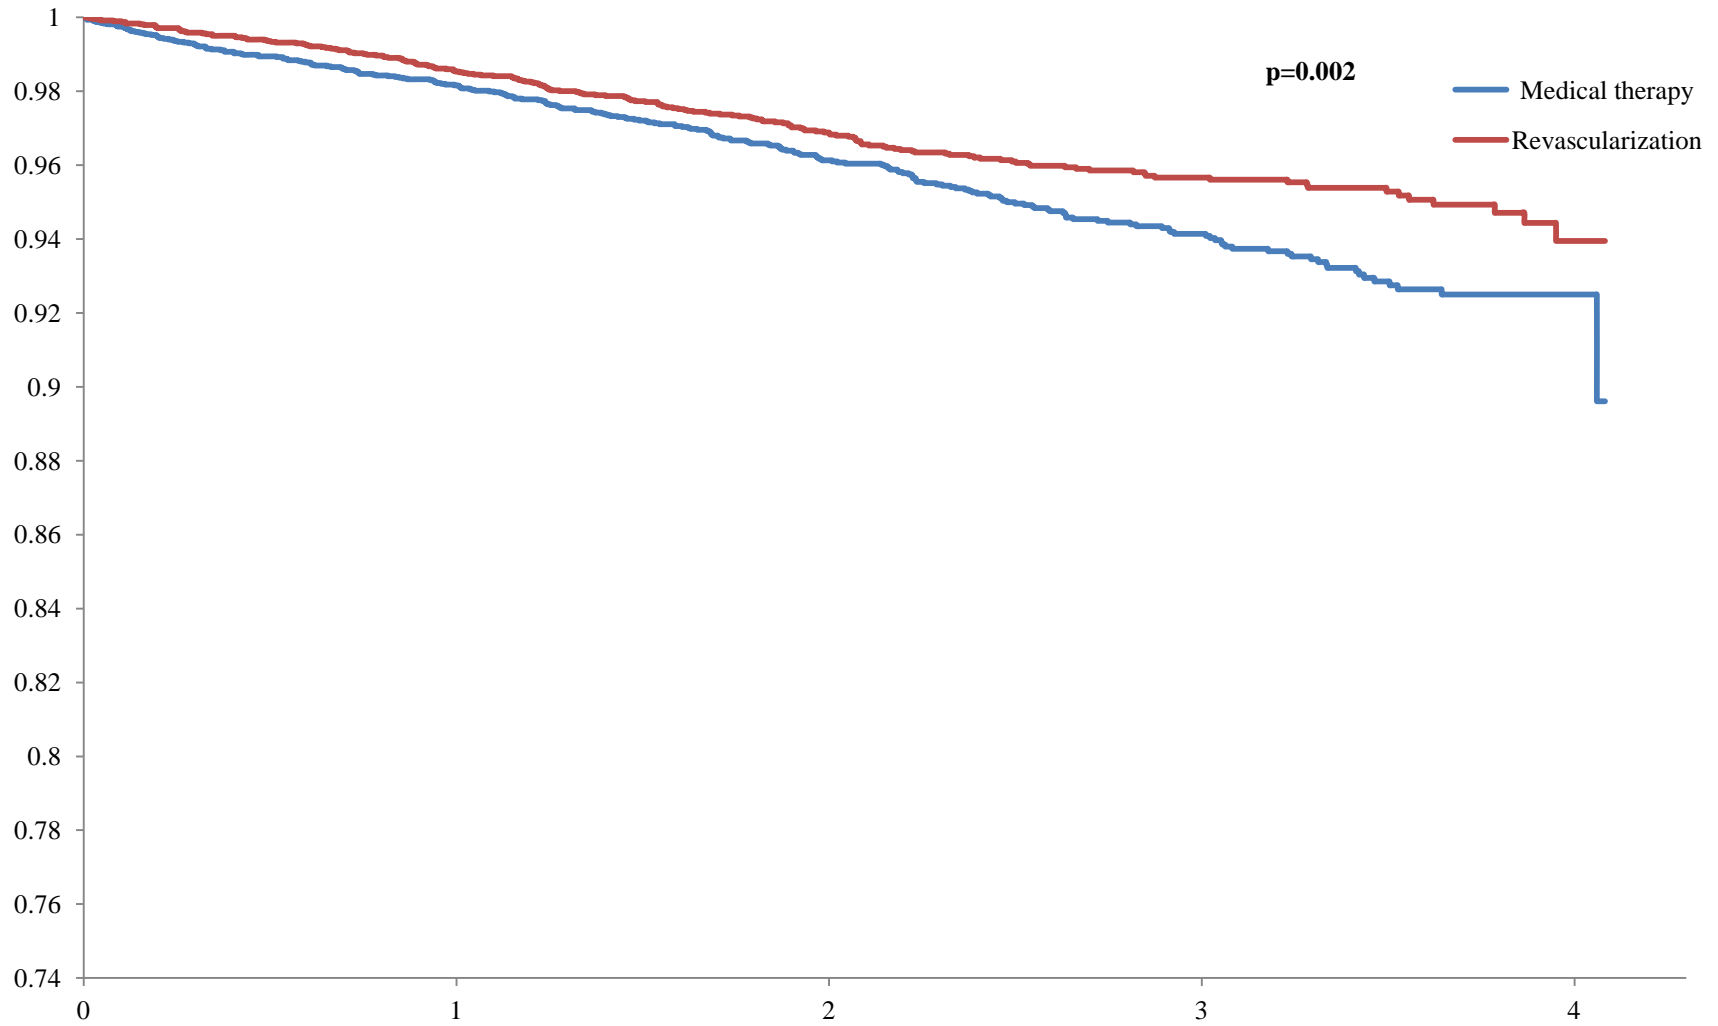

|                   |      |      |      |      |     |
|-------------------|------|------|------|------|-----|
| Revascularization | 4838 | 4767 | 3386 | 1738 | 117 |
| Medical therapy   | 4838 | 4749 | 3224 | 1694 | 140 |

Time (years)

Appendix Figure 3b: COURAGE Propensity-Matched Cohort KM Curves for Myocardial Infarction

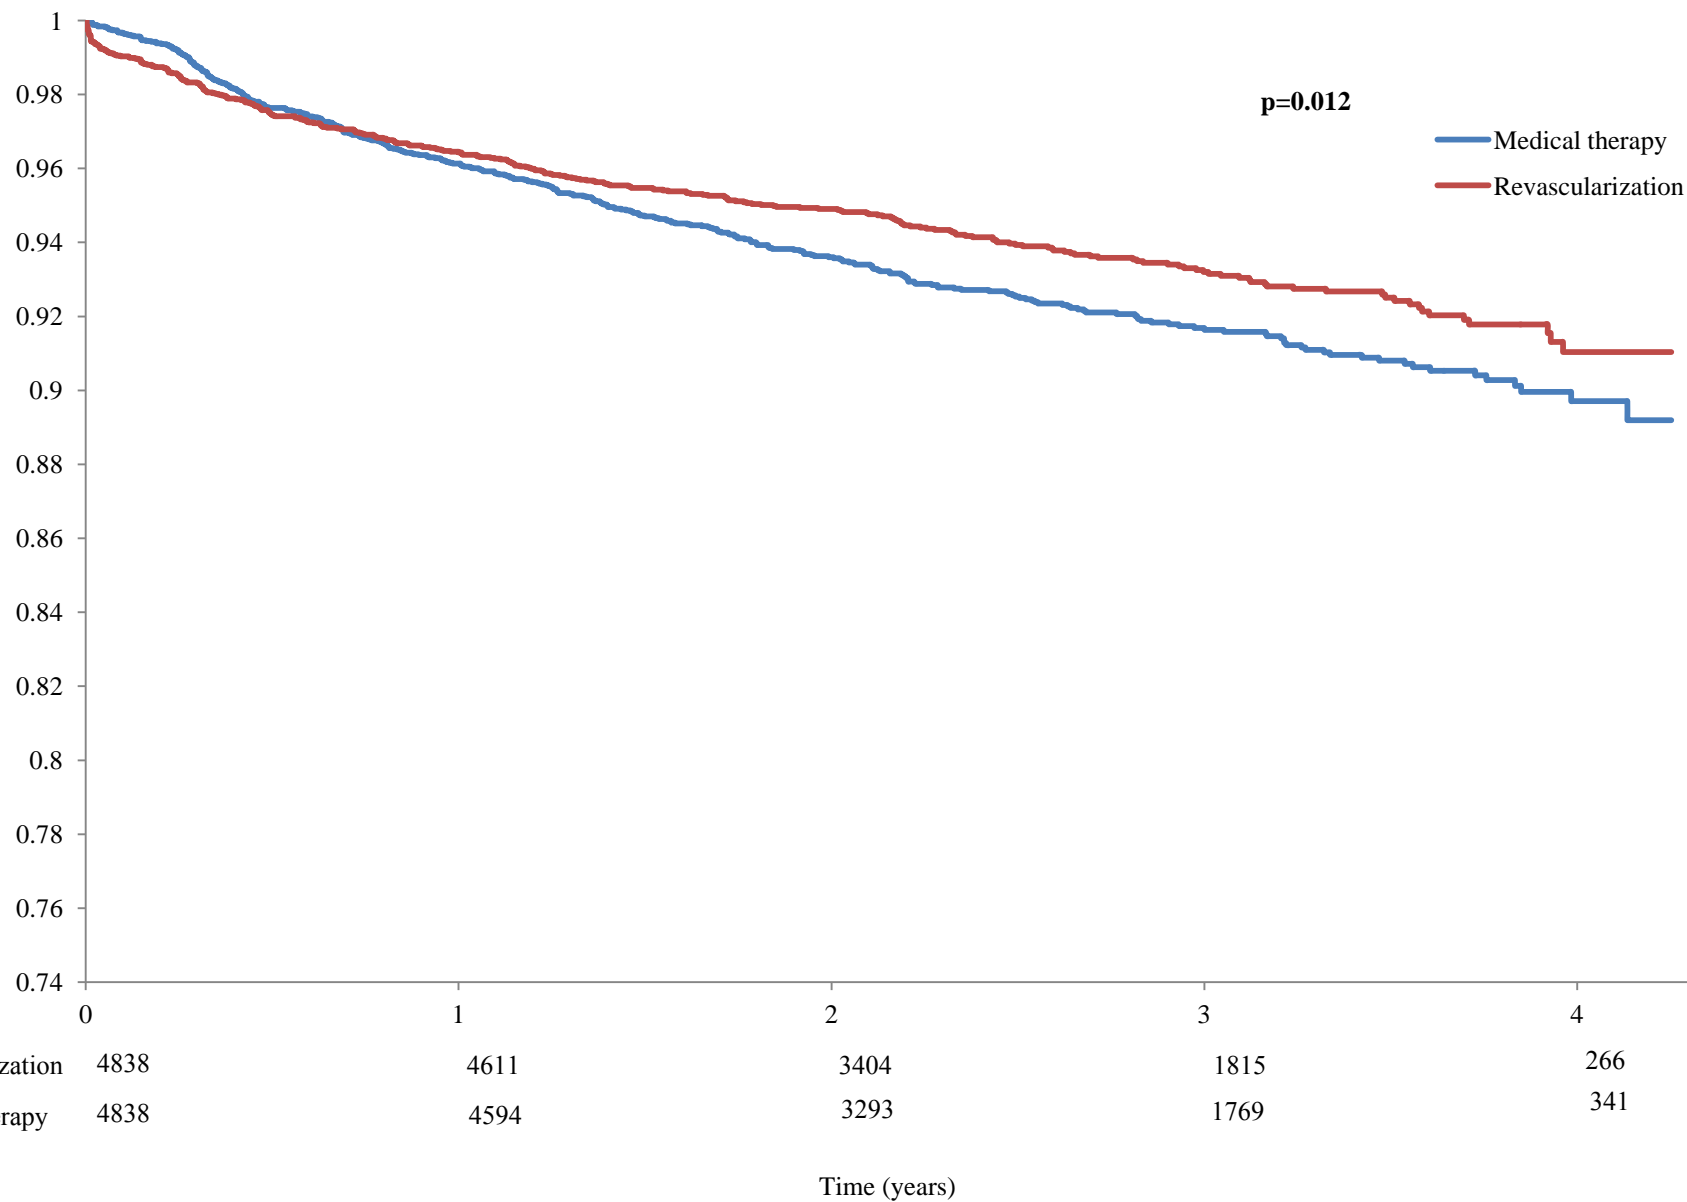

Appendix Figure 3c: COURAGE Propensity-Matched Cohort KM Curves for Repeat Revascularization

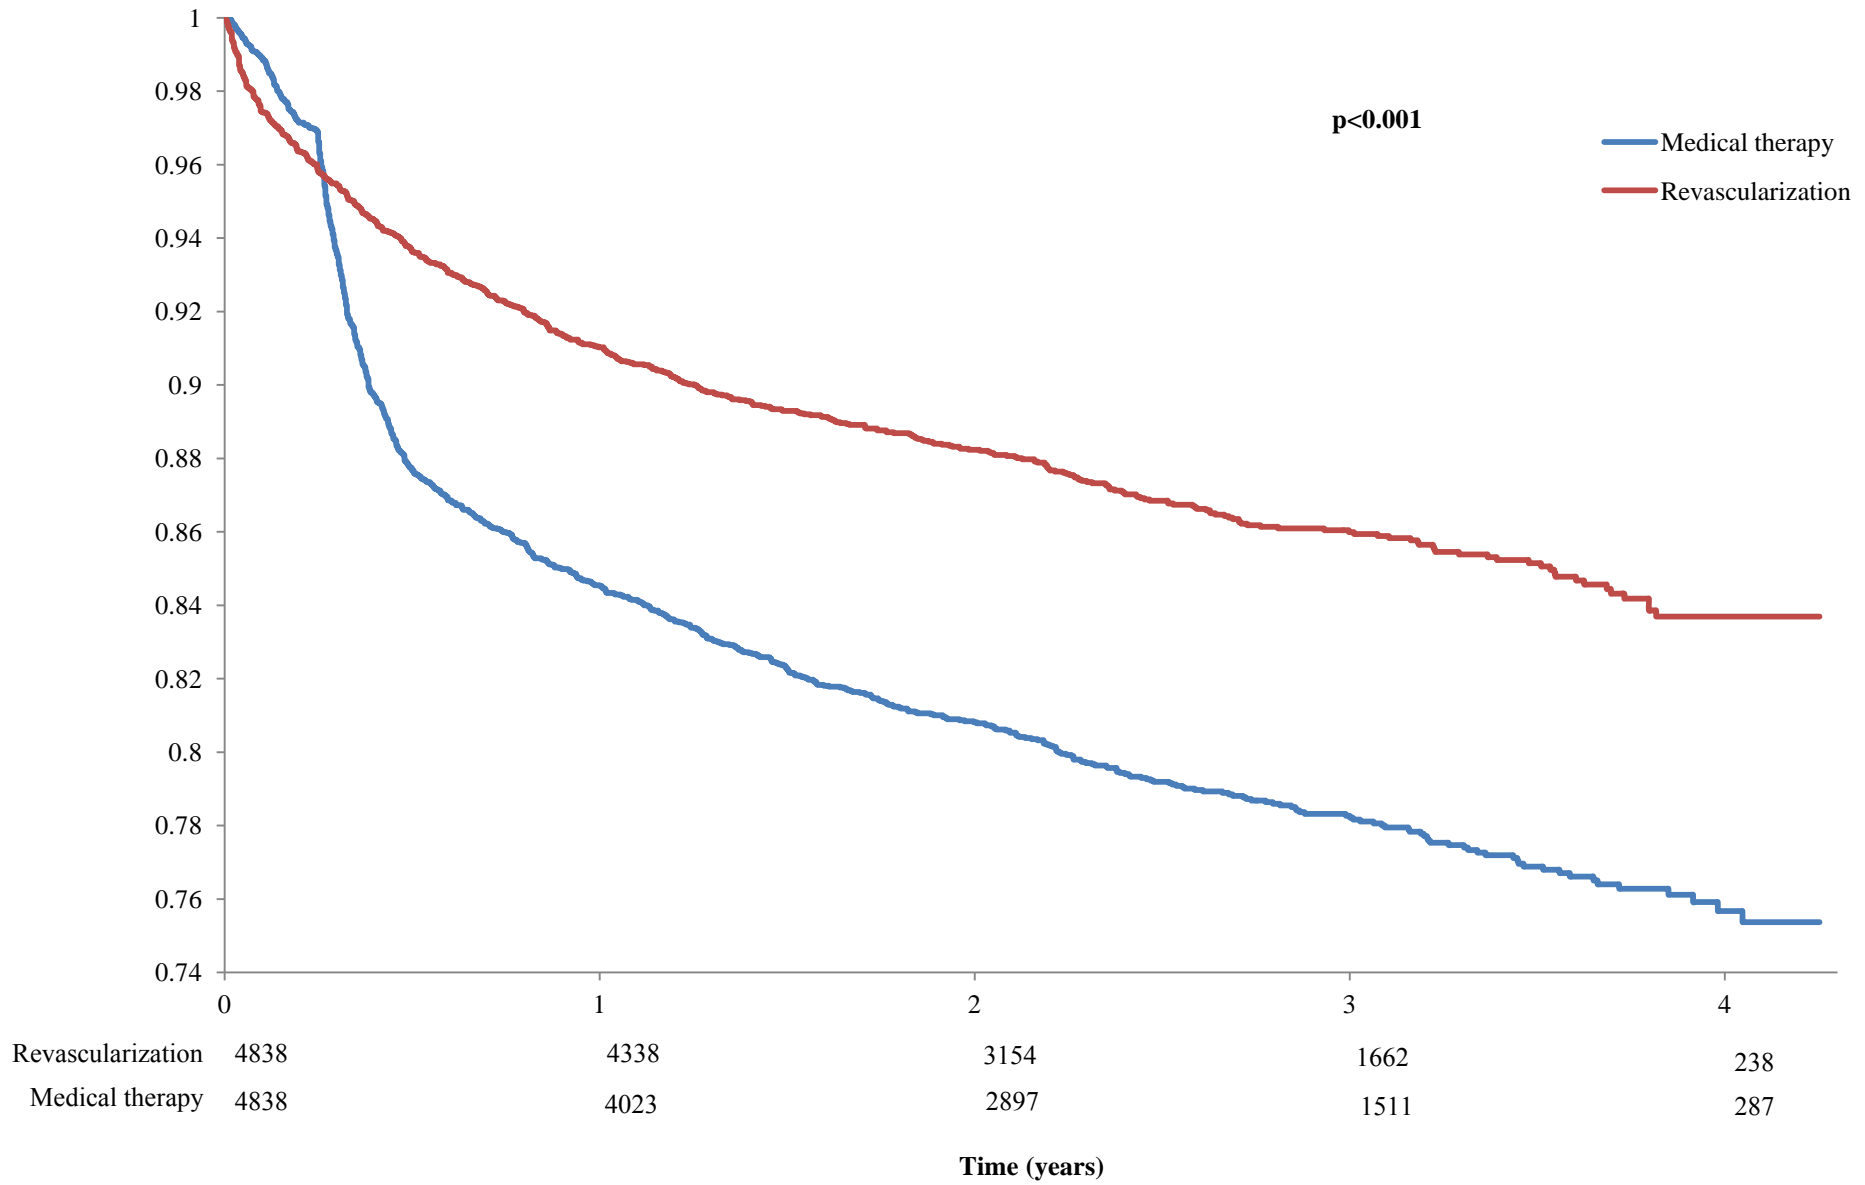

Supplement: 11606_2014_2813_MOESM1_ESM.pdf [file 11606_2014_2813_MOESM1_ESM.pdf]
